# Supplementary material for: The Interaction of Dietary Pectin, Inulin, and Psyllium with Copper Nanoparticle Induced Changes to the Cardiovascular System
Source: MDPI journal article supplement (doi:10.3390/nu15163557), 2023-08-11
Supplement: s1 [file s1]

**Table S1.** The ELISA kits used for the determination of antioxidant status in the presented study

|    | <b>Antigen</b>       | <b>ELISA kit catalogue number</b> | <b>Manufacturer, country</b> | <b>Assay range (pg/ml)</b>                                       |
|----|----------------------|-----------------------------------|------------------------------|------------------------------------------------------------------|
| 1. | Rat PTGS1 ELISA Kit  | orb566784                         | Biorbyt, UK                  | 0.156–10 ng/mL<br>Intra-Assay: CV<8%<br>Inter-Assay: CV<10%      |
| 2. | Rat PTGS2 ELISA Kit  | orb1199748                        | Biorbyt, UK                  | 78.1–5000 pg/mL<br>Intra-Assay: CV<10%<br>Inter-Assay: CV<12%    |
| 3. | Rat HO-1 ELISA Kit   | orb567452                         | Biorbyt, UK                  | 0.156–10 ng/mL<br>Intra-Assay: CV<8%<br>Inter-Assay: CV<10%      |
| 4. | Rat NOS3 ELISA Kit   | orb566738                         | Biorbyt, UK                  | 15.625–1000 pg/mL<br>Intra-Assay: CV<8%<br>Inter-Assay: CV<10%   |
| 5. | Rat GAPDH ELISA Kit  | orb567887                         | Biorbyt, UK                  | 0.156–11 ng/mL<br>Intra-Assay: CV<8%<br>Inter-Assay: CV<10%      |
| 6. | Rat ICAM-1 ELISA Kit | RAB0221-1KT                       | Sigma-Aldrich, Germany       | 28.81–7000 pg/mL<br>Intra-assay cv: <10%<br>Inter-assay cv: <12% |
